# Supplementary material for: Detection of Epstein–Barr virus infection in cancer by using highly specific nanoprobe based on dBSA capped CdTe quantum dots
Source: Royal Society of Chemistry journal article supplement (doi:10.1039/c4ra02277g), 2014-01-01
Supplement: c4ra02277g1.pdf [file c4ra02277g1.pdf]

Supplementary Data

## Detection of Epstein-Barr Virus Infection in Cancer by Using Highly Specific Nanoprobe Based on dBSA Capped CdTe Quantum Dots

*Yilin Li, Lihong Jing, Ke Ding, Jing Gao, Zhi Peng, Yanyan Li, Lin Shen\*,  
Mingyuan Gao\**

The fluorescence intensity and peak position of CdTe@dBSA with different dBSA:QD ratios, and the optical stability of CdTe@dBSA by optimal dBSA:QD ratio in 1× PBS are respectively shown in Fig S1 and S2; The fluorescent stability of CdTe@dBSA-streptavidin bioconjugate are shown in Fig S3.

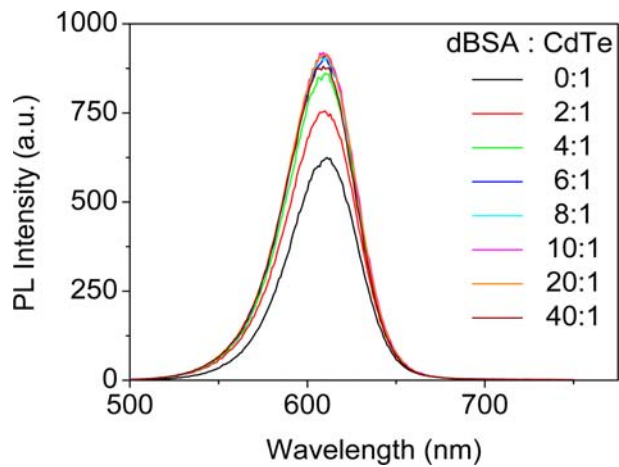

**Fig. S1.** The fluorescence spectra of CdTe@dBSA samples obtained by different dBSA:QD ratios.

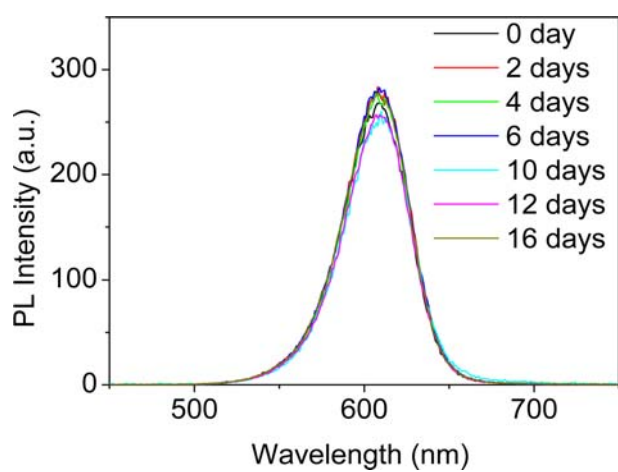

**Fig. S2.** The fluorescence spectra of CdTe@dBSA (by dBSA:QD at 6:1) continually recorded over 16 days.

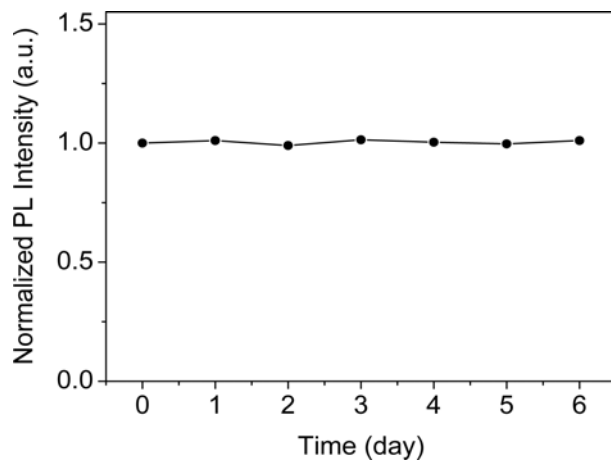

**Fig. S3.** Temporal evolution of fluorescence intensity of CdTe@dBSA-streptavidin over 6 days.
